# Supplementary material for: Versatility and Invariance in the Evolution of Homologous Heteromeric Interfaces
Source: PubMed Central journal article supplement (PMC3431345; doi:10.1371/journal.pcbi.1002677), 2012-08-30
Supplement: pcbi.1002677.s003.pdf [file pcbi.1002677.s003.pdf]

## Text S2 – Supplementary tables and figures

**Supporting Table 1.** Abundance of whole interface (I), core (C), support (S) and rim (R) residues (as measured by the number of residues or the area contributed to the interface) in all interfaces present in the dataset of interologs and in the subsets of non-obligate and obligate interfaces. Comparison with the values obtained from a dataset of 70 complexes by Chakrabarti & Janin (Proteins 2002) [CJ02].

|          | All interfaces (956) |     |     |     |      |      |      |      | Non-obligate interfaces (544) |     |     |      |      |      |     |      | Obligate interfaces (412) |     |     |     |      |      |      |      | 70 interfaces from [CJ02] |     |     |      |      |      |
|----------|----------------------|-----|-----|-----|------|------|------|------|-------------------------------|-----|-----|------|------|------|-----|------|---------------------------|-----|-----|-----|------|------|------|------|---------------------------|-----|-----|------|------|------|
|          | Number               |     |     |     | Area |      |      |      | Number                        |     |     |      | Area |      |     |      | Number                    |     |     |     | Area |      |      |      | Number                    |     |     | Area |      |      |
|          | I                    | C   | S   | R   | I    | C    | S    | R    | I                             | C   | S   | R    | I    | C    | S   | R    | I                         | C   | S   | R   | I    | C    | S    | R    | I                         | C   | R   | I    | C    | R    |
| <b>A</b> | 6.4                  | 7.2 | 8.5 | 4.9 | 4.1  | 4.9  | 4.3  | 3.0  | 5.8                           | 6.5 | 8.1 | 4.2  | 3.8  | 4.7  | 4.4 | 2.6  | 7.0                       | 7.8 | 8.8 | 5.5 | 4.3  | 5.1  | 4.2  | 3.3  | 3.9                       | 4.0 | 3.8 | 2.8  | 2.7  | 3.1  |
| <b>C</b> | 1.9                  | 1.9 | 4.2 | 0.8 | 1.1  | 1.4  | 2.5  | 0.5  | 2.4                           | 2.4 | 5.6 | 1.0  | 1.3  | 1.5  | 3.0 | 0.6  | 1.4                       | 1.5 | 2.9 | 0.6 | 1.0  | 1.2  | 2.1  | 0.5  | 3.5                       | 4.7 | 2.1 | 1.7  | 1.9  | 1.3  |
| <b>D</b> | 5.9                  | 4.4 | 4.1 | 7.8 | 4.6  | 3.8  | 3.0  | 5.9  | 6.2                           | 4.8 | 4.6 | 7.9  | 4.8  | 4.2  | 2.8 | 6.0  | 5.6                       | 4.1 | 3.6 | 7.6 | 4.4  | 3.5  | 3.1  | 5.9  | 6.6                       | 5.4 | 8.0 | 5.1  | 4.5  | 6.6  |
| <b>E</b> | 6.6                  | 4.5 | 3.6 | 9.5 | 6.4  | 4.8  | 4.2  | 9.0  | 7.0                           | 4.7 | 3.9 | 10.0 | 7.1  | 5.1  | 4.9 | 9.8  | 6.2                       | 4.3 | 3.4 | 9.1 | 5.9  | 4.5  | 3.6  | 8.3  | 6.5                       | 4.6 | 8.6 | 6.0  | 4.4  | 10.0 |
| <b>F</b> | 4.5                  | 5.2 | 6.0 | 3.4 | 6.0  | 6.5  | 8.1  | 4.9  | 3.7                           | 4.1 | 4.9 | 2.8  | 4.7  | 4.9  | 6.6 | 4.0  | 5.3                       | 6.1 | 6.9 | 3.9 | 7.1  | 7.8  | 9.3  | 5.8  | 3.5                       | 5.1 | 1.7 | 4.1  | 5.5  | 1.1  |
| <b>G</b> | 7.0                  | 7.7 | 8.6 | 5.6 | 3.5  | 4.0  | 4.3  | 2.6  | 7.0                           | 8.3 | 8.3 | 5.6  | 3.6  | 4.4  | 4.8 | 2.5  | 6.9                       | 7.2 | 8.9 | 5.6 | 3.3  | 3.7  | 3.8  | 2.7  | 8.1                       | 7.5 | 8.7 | 4.8  | 4.2  | 6.4  |
| <b>H</b> | 2.7                  | 2.5 | 3.3 | 2.4 | 2.9  | 2.9  | 4.3  | 2.5  | 2.8                           | 2.4 | 4.1 | 2.5  | 2.9  | 2.7  | 5.4 | 2.6  | 2.5                       | 2.6 | 2.7 | 2.4 | 2.8  | 3.0  | 3.4  | 2.5  | 3.4                       | 4.4 | 2.3 | 3.8  | 4.4  | 2.4  |
| <b>I</b> | 5.0                  | 5.6 | 6.1 | 4.1 | 5.4  | 6.0  | 5.2  | 4.6  | 4.6                           | 5.2 | 5.7 | 3.8  | 4.7  | 5.4  | 4.6 | 4.0  | 5.4                       | 6.0 | 6.5 | 4.4 | 5.9  | 6.5  | 5.8  | 5.1  | 3.6                       | 4.1 | 3.1 | 4.6  | 4.9  | 3.5  |
| <b>K</b> | 5.3                  | 3.4 | 2.6 | 7.9 | 5.7  | 4.0  | 3.8  | 8.2  | 5.7                           | 3.7 | 2.6 | 8.4  | 6.3  | 4.5  | 3.6 | 9.0  | 4.9                       | 3.2 | 2.5 | 7.3 | 5.2  | 3.6  | 3.9  | 7.6  | 5.7                       | 3.7 | 8.0 | 6.5  | 5.2  | 9.7  |
| <b>L</b> | 8.3                  | 9.3 | 9.4 | 7.0 | 10.0 | 11.0 | 9.7  | 8.8  | 7.4                           | 8.8 | 9.0 | 5.8  | 9.1  | 10.7 | 9.5 | 7.2  | 9.0                       | 9.7 | 9.9 | 8.0 | 10.7 | 11.3 | 10.0 | 10.2 | 5.0                       | 5.5 | 4.5 | 5.7  | 5.8  | 5.3  |
| <b>M</b> | 2.6                  | 3.0 | 2.7 | 2.3 | 3.2  | 3.4  | 3.3  | 2.9  | 2.2                           | 2.3 | 2.1 | 2.2  | 2.6  | 2.6  | 2.2 | 2.8  | 3.0                       | 3.5 | 3.3 | 2.4 | 3.7  | 4.1  | 4.1  | 3.1  | 2.0                       | 2.6 | 1.4 | 3.2  | 3.7  | 2.0  |
| <b>N</b> | 4.1                  | 4.2 | 3.0 | 4.6 | 3.9  | 3.9  | 2.9  | 4.3  | 4.5                           | 4.5 | 3.0 | 5.1  | 4.4  | 4.2  | 2.9 | 4.9  | 3.8                       | 4.0 | 3.0 | 4.1 | 3.6  | 3.7  | 2.8  | 3.7  | 5.9                       | 5.4 | 6.4 | 5.7  | 5.4  | 6.4  |
| <b>P</b> | 5.0                  | 5.2 | 3.5 | 5.7 | 4.6  | 4.7  | 3.1  | 4.9  | 4.6                           | 4.6 | 2.5 | 5.6  | 4.1  | 4.2  | 2.0 | 4.6  | 5.5                       | 5.6 | 4.4 | 5.8 | 5.0  | 5.1  | 4.0  | 5.1  | 3.8                       | 3.4 | 4.2 | 3.6  | 3.5  | 4.1  |
| <b>Q</b> | 4.0                  | 4.1 | 2.8 | 4.4 | 4.7  | 4.7  | 4.2  | 4.9  | 4.5                           | 4.6 | 3.0 | 5.1  | 5.5  | 5.5  | 4.5 | 5.8  | 3.5                       | 3.7 | 2.6 | 3.9 | 4.1  | 4.1  | 3.9  | 4.2  | 3.7                       | 3.7 | 3.8 | 4.3  | 4.3  | 4.2  |
| <b>R</b> | 6.8                  | 6.1 | 4.6 | 8.4 | 10.4 | 9.0  | 9.2  | 12.5 | 7.0                           | 6.1 | 4.8 | 8.7  | 11.0 | 9.4  | 9.6 | 13.3 | 6.6                       | 6.1 | 4.4 | 8.1 | 9.9  | 8.7  | 8.8  | 11.8 | 6.4                       | 5.9 | 7.0 | 10.1 | 10.1 | 9.9  |
| <b>S</b> | 6.1                  | 6.4 | 5.8 | 5.9 | 4.0  | 4.4  | 3.6  | 3.7  | 6.6                           | 7.0 | 6.7 | 6.2  | 4.4  | 4.9  | 4.3 | 3.9  | 5.6                       | 5.9 | 5.0 | 5.7 | 3.7  | 4.1  | 3.0  | 3.5  | 7.9                       | 7.8 | 8.1 | 5.4  | 4.8  | 7.3  |
| <b>T</b> | 5.6                  | 6.1 | 4.9 | 5.6 | 4.7  | 5.1  | 3.4  | 4.4  | 6.0                           | 6.8 | 4.9 | 6.0  | 5.1  | 5.6  | 3.5 | 4.9  | 5.3                       | 5.6 | 5.0 | 5.2 | 4.3  | 4.7  | 3.3  | 4.0  | 6.2                       | 5.7 | 6.8 | 5.0  | 4.7  | 5.9  |
| <b>V</b> | 5.9                  | 6.7 | 7.4 | 4.7 | 5.4  | 6.1  | 5.7  | 4.4  | 5.6                           | 6.5 | 7.3 | 4.2  | 5.1  | 6.0  | 5.6 | 4.0  | 6.2                       | 6.9 | 7.5 | 5.1 | 5.6  | 6.3  | 5.7  | 4.8  | 4.5                       | 4.3 | 4.7 | 3.8  | 3.8  | 3.9  |
| <b>W</b> | 1.8                  | 1.8 | 2.9 | 1.3 | 2.8  | 2.8  | 5.5  | 2.2  | 1.8                           | 1.7 | 3.2 | 1.3  | 2.9  | 2.8  | 6.9 | 2.0  | 1.8                       | 1.8 | 2.6 | 1.4 | 2.8  | 2.8  | 4.4  | 2.4  | 2.8                       | 4.1 | 1.3 | 4.2  | 5.3  | 1.6  |
| <b>Y</b> | 4.6                  | 4.7 | 6.1 | 3.8 | 6.6  | 6.7  | 10.0 | 5.8  | 4.6                           | 5.0 | 5.8 | 3.7  | 6.6  | 6.9  | 9.1 | 5.7  | 4.6                       | 4.5 | 6.4 | 3.8 | 6.7  | 6.5  | 10.8 | 5.9  | 6.8                       | 8.1 | 5.4 | 9.4  | 10.9 | 5.3  |

**Supporting Table 2.** Details of the logistic regression models for the switching out predictor and the contact conservation predictor. The deviance from LRT (Likelihood Ratio Test) was obtained by dropping each parameter one at a time and assessing the corresponding variation in deviance. The deviance from the progressive inclusion of all 6 parameters (in the order determined by their rank, obtained from the previous “dropping” analysis) is also reported. The significance (Signif.) of each parameter was assessed both from the z-tests performed on the logistic regression coefficients and from the deviance test: significance values were always found to be  $< 2.2e-16$  (indicated by \*\*\* in the table). Standard deviations (sd) are reported over 10 repeats.

| Category           | Features                               | Switching out predictor                     |         |                                     |                                         |                                               | Contact conservation predictor               |         |                                     |                                         |                                               |
|--------------------|----------------------------------------|---------------------------------------------|---------|-------------------------------------|-----------------------------------------|-----------------------------------------------|----------------------------------------------|---------|-------------------------------------|-----------------------------------------|-----------------------------------------------|
|                    |                                        | Coefficient in logistic regression equation | Signif. | Rank in deviance reduction analysis | Variation in deviance (LRT, "dropping") | Variation in deviance (progressive inclusion) | Coefficient in logistic regression equation  | Signif. | Rank in deviance reduction analysis | Variation in deviance (LRT, "dropping") | Variation in deviance (progressive inclusion) |
| Sequence Features  | Similarity residue (BLOSUM62)          | -0.054 (sd 0.005)                           | ***     | 6                                   | 115 (sd 21)                             | 115 (sd 21)                                   | 0.112 (sd 0.005)                             | ***     | 3                                   | 858 (sd 102)                            | 1688 (sd 192)                                 |
|                    | Similarity environment (BLOSUM62)      | -0.128 (sd 0.005)                           | ***     | 3                                   | 513 (sd 50)                             | 742 (sd 74)                                   | 0.224 (sd 0.007)                             | ***     | 1                                   | 3033 (sd 207)                           | 4638 (sd 423)                                 |
|                    | Overall sequence id                    | -0.0096 (sd 0.0010)                         | ***     | 5                                   | 220 (sd 49)                             | 509 (sd 74)                                   | 0.0066 (sd 0.0009)                           | ***     | 5                                   | 162 (sd 43)                             | 156 (sd 39)                                   |
| Geometric Features | Core / Support / Rim                   | 0 (sd NA) / 0.96 (sd 0.08) / 1.06 (sd 0.07) | ***     | 2                                   | 566 (sd 77)                             | 920 (sd 97)                                   | 0 (sd NA) / 0.23 (sd 0.04) / -0.21 (sd 0.03) | ***     | 4                                   | 191 (sd 29)                             | 316 (sd 38)                                   |
|                    | Number of atomic contacts per residue  | -0.122 (sd 0.006)                           | ***     | 1                                   | 1381 (sd 88)                            | 3585 (sd 143)                                 | 0.075 (sd 0.002)                             | ***     | 2                                   | 1744 (sd 138)                           | 2179 (sd 195)                                 |
|                    | Distance to interface geometric center | 1.40 (sd 0.09)                              | ***     | 4                                   | 357 (sd 51)                             | 371 (sd 55)                                   | -0.69 (sd 0.06)                              | ***     | 6                                   | 131 (sd 21)                             | 131 (sd 21)                                   |
| Intercept          |                                        | -1.99 (sd 0.09)                             |         |                                     |                                         |                                               | -1.32 (sd 0.06)                              |         |                                     |                                         |                                               |

**Supporting Table 3.** List of 52 cases where for a given complex, the structures of both at least one interolog and a redundant complex (over 95% sequence identity) are available. When several interologous structures are available, they are indicated in the third column of the table. When several complexes from the same group of interologs are present in the table, this is indicated in the fourth column of the table (this corresponds to one case with 3 interologs belonging to the same group and 6 cases with 2 interologs belonging to the same group).

| Complex of interest | Redundant complex | Interolog(s)                                   | Interolog group |
|---------------------|-------------------|------------------------------------------------|-----------------|
| 1twf_BA             | 3hou_BA           | 3h0g_BA, 2waq_BA, 2a6h_CD                      |                 |
| 2a6h_CD             | 3aoh_CD           | 3h0g_BA, 2waq_BA, 1twf_BA                      | same as 1twf_BA |
| 2waq_BA             | 2pmz_CA           | 3h0g_BA, 1twf_BA, 2a6h_CD                      | same as 1twf_BA |
| 1y8q_BA             | 3kyc_BA           | 1tt5_BA                                        |                 |
| 1tt5_BA             | 3dbh_BA           | 1y8q_BA                                        | same as 1y8q_BA |
| 1twf_BJ             | 3hou_BL           | 2waq_BK, 3h0g_BL                               |                 |
| 2waq_BK             | 2pmz_CK           | 1twf_BJ, 3h0g_BL                               | same as 1twf_BJ |
| 2waq_FA             | 2pmz_HA           | 3h0g_CA, 1twf_EA                               |                 |
| 1twf_EA             | 3hou_FA           | 3h0g_CA, 2waq_FA                               | same as 2waq_FA |
| 1xwd_AB             | 1fl7_AB           | 1hcn_AB                                        |                 |
| 1hcn_AB             | 1qfw_AB           | 1xwd_AB                                        | same as 1xwd_AB |
| 2pa8_AB             | 2pmz_DI           | 1twf_CI                                        |                 |
| 1twf_CI             | 3gtm_CI           | 2pa8_AB                                        | same as 2pa8_AB |
| 1tgz_BA             | 2io2_HD           | 2bkr_BA, 2ckh_BA, 2iy1_BA,<br>2io0_BA, 1euv_BA |                 |
| 2iy1_BA             | 2iy0_BA           | 2bkr_BA, 2ckh_BA, 2io0_BA,<br>1euv_BA, 1tgz_BA | same as 1tgz_BA |
| 2jdi_EG             | 1h8e_EG           | 3oee_EG                                        |                 |
| 2h62_BC             | 1rew_BD           | 3evs_BC                                        |                 |
| 1gp2_CB             | 2bcj_CB           | 1got_CB                                        |                 |
| 2gc4_BC             | 2j56_BA           | 3c75_EF                                        |                 |
| 1ryp_WP             | 1fnt_WP           | 1q5q_NG, 3mi0_JI, 1ryp_HA                      |                 |
| 3cx5_ML             | 1ezv_ML           | 1zrt_ED, 1bcc_DC, 2qjy_ED                      |                 |
| 1jwi_BA             | 1uex_BA           | 1fvu_DC                                        |                 |
| 1rzh_BC             | 1l9b_BC           | 2wjn_DB                                        |                 |
| 1twf_BC             | 3hou_BC           | 2waq_BI, 3h0g_BE                               |                 |
| 2jdi_FG             | 2v7q_JD           | 3oee_FG                                        |                 |
| 1fqj_AB             | 1fqk_AB           | 2ode_AB, 2gtp_AB, 2ihb_AB,<br>1agr_AB, 2v4z_AB |                 |
| 2gsm_BA             | 1m56_BA           | 1fft_BA, 3hb3_BA, 1xme_BA,<br>1v54_BA          |                 |
| 3cx5_JL             | 1ezv_JL           | 1bcc_AC                                        |                 |
| 2jdi_DG             | 1h8e_DG           | 3oee_DG                                        |                 |
| 1tvk_AB             | 1sa0_CD           | 2btq_DB                                        |                 |
| 1dce_BA             | 1ltx_BA           | 3dra_BA, 1n4q_BA, 2h6f_BA                      |                 |
| 1jat_BA             | 2gmi_BA           | 1j7d_AB                                        |                 |
| Complex of interest | Redundant complex | Interolog(s)                                   | Interolog group |

|         |         |                                                |  |
|---------|---------|------------------------------------------------|--|
| 1twf_FA | 3hou_HA | 2waq_DA, 3h0g_HA                               |  |
| 2cch_AB | 1jsu_AB | 1f5q_AB, 2jgz_AB, 2f2c_BA,<br>3mi9_AB, 1w98_AB |  |
| 1m1n_AB | 2afh_AB | 1qgu_CD, 2xdq_AB, 3aek_AB,<br>1mio_AB          |  |
| 2h62_CA | 1rew_CB | 3evs_DB                                        |  |
| 3cx5_KJ | 1ezv_KJ | 1hr6_AB, 1bcc_BA                               |  |
| 2r6g_AE | 3fh6_CB | 3dhw_DB, 2r6g_BD, 2onk_AC,<br>3d31_AC          |  |
| 1q16_AB | 1r27_AB | 2ivf_AB                                        |  |
| 3hou_FG | 1y1v_FG | 3h0g_CK                                        |  |
| 2pu9_CA | 2pvo_CA | 2puk_BA                                        |  |
| 1m1n_CB | 2afh_AD | 1qgu_CB, 3aek_AD, 1mio_CB                      |  |
| 2a6h_CA | 3aoh_CA | 2waq_BI                                        |  |
| 3ge3_BF | 3dhg_AC | 2inc_BF                                        |  |
| 1f45_BA | 3hmx_BA | 1p9m_DF                                        |  |
| 1twf_AD | 3hou_AE | 3h0g_AG                                        |  |
| 1twf_CJ | 3hou_CL | 2waq_IK, 3h0g_EL                               |  |
| 1twf_CH | 3gtm_CH | 2waq_IJ, 3h0g_ED                               |  |
| 1h8e_BG | 2v7q_GD | 3oee_BG                                        |  |
| 1twf_BG | 3hou_BI | 3h0g_BI                                        |  |
| 1twf_GA | 3hou_IA | 3h0g_IA                                        |  |
| 1rzh_CA | 1l9b_CA | 1eys_DB, 2wjn_BC                               |  |

**Supporting Table 4.** Properties (abundance and conservation) of interface residues, anchor residues and residues in apolar patches in terms of amino acid type and sub-region of the interface.

| <b>Amino acid type or sub-region of the interface</b> | <b>Relative abundance at interface (%)</b> | <b>Relative abundance among anchor residues (%)</b> | <b>Relative abundance in apolar patches (weighted by contribution in number of atoms) (%)</b> |
|-------------------------------------------------------|--------------------------------------------|-----------------------------------------------------|-----------------------------------------------------------------------------------------------|
| A                                                     | 6.4                                        | 1.1                                                 | 3.3                                                                                           |
| C                                                     | 1.9                                        | 0.1                                                 | 1.9                                                                                           |
| D                                                     | 5.9                                        | 1.6                                                 | 1.3                                                                                           |
| E                                                     | 6.6                                        | 3.5                                                 | 2.8                                                                                           |
| F                                                     | 4.5                                        | 9.9                                                 | 13.3                                                                                          |
| G                                                     | 7.0                                        | 0.2                                                 | 0.6                                                                                           |
| H                                                     | 2.7                                        | 2.2                                                 | 2.2                                                                                           |
| I                                                     | 5.0                                        | 6.2                                                 | 8.2                                                                                           |
| K                                                     | 5.3                                        | 4.9                                                 | 4.0                                                                                           |
| L                                                     | 8.3                                        | 14.5                                                | 14.2                                                                                          |
| M                                                     | 2.6                                        | 3.4                                                 | 4.5                                                                                           |
| N                                                     | 4.1                                        | 3.2                                                 | 1.0                                                                                           |
| P                                                     | 5.0                                        | 3.3                                                 | 5.0                                                                                           |
| Q                                                     | 4.0                                        | 6.6                                                 | 2.5                                                                                           |
| R                                                     | 6.8                                        | 14.7                                                | 4.7                                                                                           |
| S                                                     | 6.1                                        | 1.2                                                 | 1.3                                                                                           |
| T                                                     | 5.6                                        | 2.8                                                 | 3.8                                                                                           |
| V                                                     | 5.9                                        | 2.8                                                 | 7.8                                                                                           |
| W                                                     | 1.8                                        | 5.6                                                 | 6.1                                                                                           |
| Y                                                     | 4.6                                        | 12.3                                                | 11.6                                                                                          |
| Core                                                  | 34                                         | 99                                                  | 44                                                                                            |
| Support                                               | 24                                         | 1                                                   | 27                                                                                            |
| Rim                                                   | 42                                         | 0                                                   | 29                                                                                            |

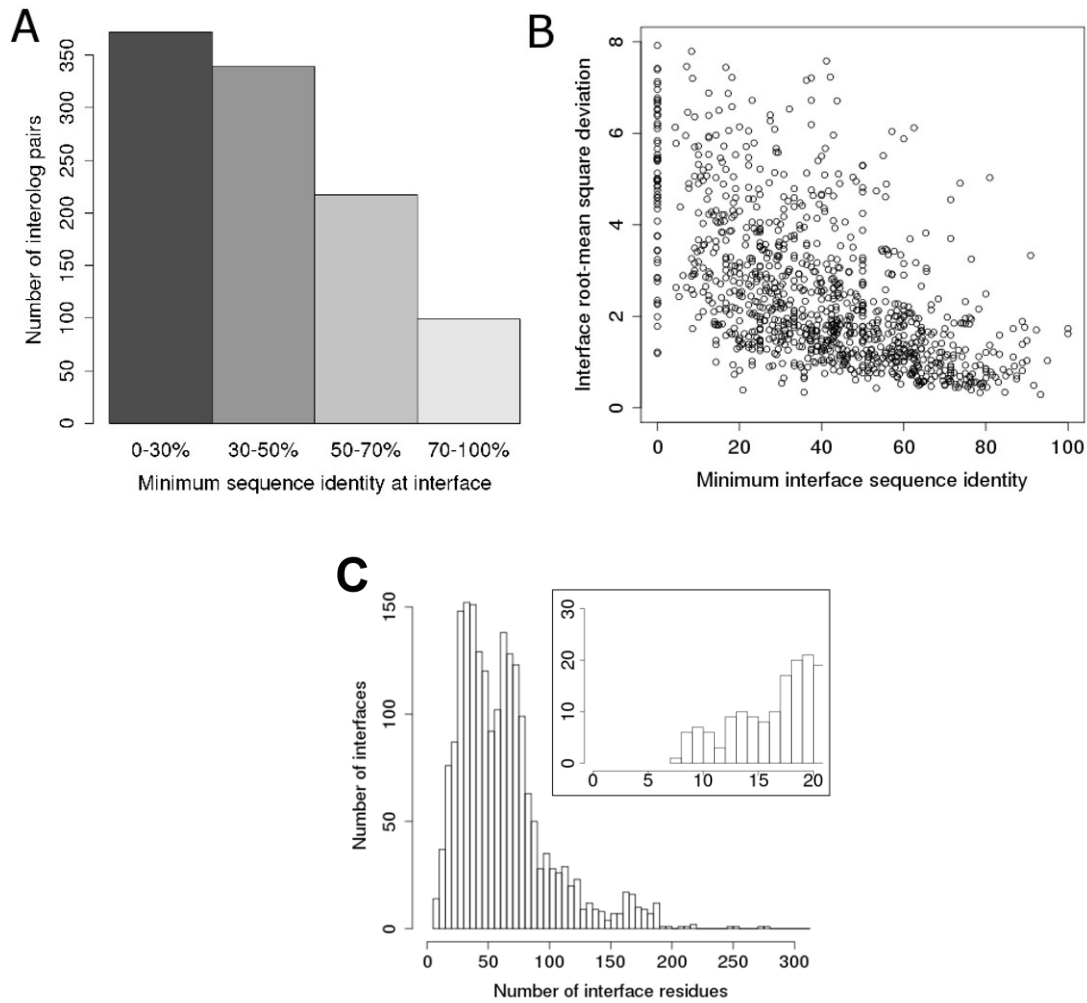

**Supporting Figure 1.** Properties of the 1,024 pairs of interologs in the whole interolog dataset (not including *redundant95*). (A) Distribution of the number of interolog pairs in the main dataset as a function of the minimum sequence identity at interface. (B) Distribution of the interface root-mean square deviation (iRMSD) of all pairs of interologs in the main dataset as a function of the minimum sequence identity at interface. (C) Distribution of interface size (expressed as the number of residues involved in each interface). In this distribution, each interface is counted once for each pair of interologs it is involved in. Inset: close-up on the 0-20 residue range.

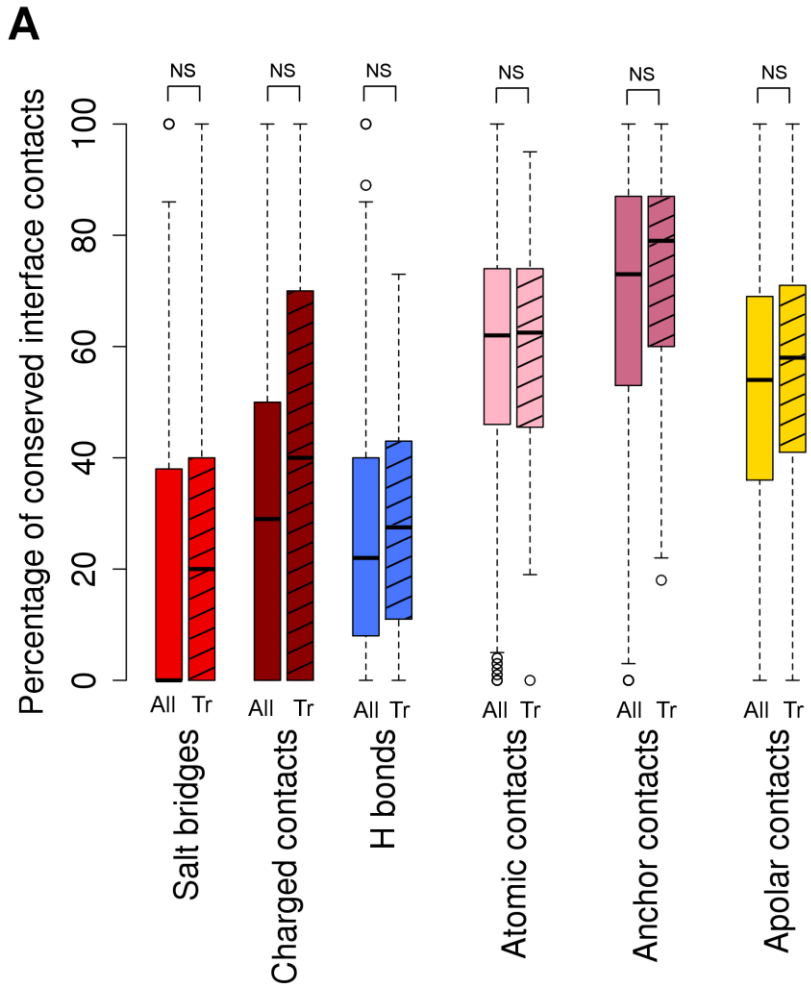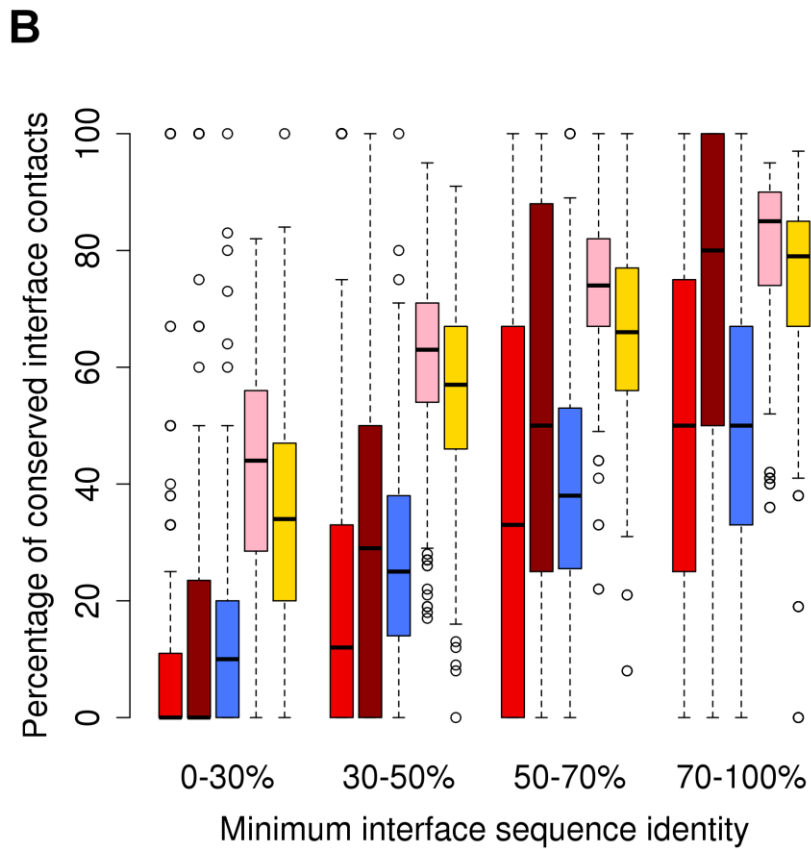

**Supporting Figure 2.** Distributions of the contact conservation values for all 1,024 pairs of interologs (All, not striped) and for a restricted subset of 60 transient interolog pairs (Tr for Transient, striped). From left to right, salt bridges (red), charged contacts at 5.5 Å (dark red), hydrogen bonds (blue), atomic contacts (pale pink), atomic contacts involving at least one anchor residue in either of the two interologs (dark pink), apolar contacts (gold). For any type of contacts, between the distribution for the whole dataset and the distribution for the 60 transient pairs, there is no significant difference (NS) ( $p$ -value  $> 0.1$  in Wilcoxon rank sum tests). (B) Distributions of the conservation among different types of interface contacts. Colors are the same as in main Figure 2A. For all types of contacts, the differences between any two distributions of conservation among the four groups of sequence identities are statistically significant ( $p$ -value  $< 6.8e-3$  in Wilcoxon rank sum tests).



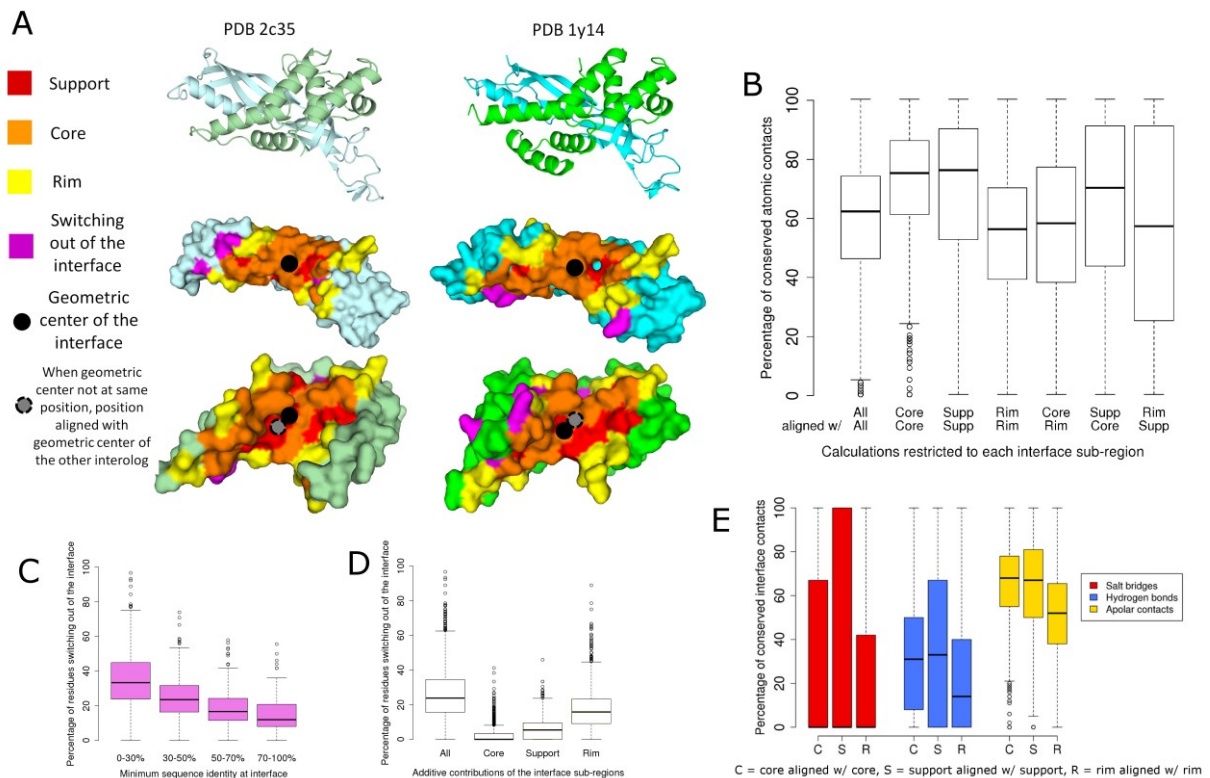

**Supporting Figure 3.** Core, support, rim and switching out of the interface. (A) Illustration of the different sub-regions of the interface, the residues switching out of the interface and the geometric center of the interface on a pair of interologs with 33% minimum interface sequence identity. (B) Distributions of the conservation of interface atomic contacts for residues split by interface sub-region: residues which are structurally aligned with a residue from the same sub-region of the interface (core aligned with core, support aligned with support or rim aligned with rim), then residues which are structurally aligned with a residue belonging to a different sub-region in the interolog. These distributions are compared to the global distribution for all atomic contacts (on the left, All aligned with All). The distributions for residues belonging to the core or the support in both interologs are all significantly higher than the distributions for residues belonging to the rim sub-region in at least one of the two interologs (all p-values in Wilcoxon rank-sum tests  $< 3e-5$ ). (C-D) Switching out of the interface. Figure (C) shows the distribution of the proportion of residues switching out of the interface as a function of minimum sequence identity at interface. The differences between the four distributions (0-30%, 30-50%, 50-70%, 70-100%) are statistically significant (p-value in Wilcoxon rank sum tests  $< 6.6e-6$ ). Figure (D) shows the additive contributions of the different interface sub-regions (core, support and rim) to the proportion of residues switching out of the interface. The core, support and rim distributions are significantly different from each other (p-value in Wilcoxon rank sum tests  $< 2.2e-16$ ). (E) Percentage of conserved interface contacts including only residues which are structurally aligned with a residue from the same sub-region of the interface.

interface (core aligned with core, support aligned with support or rim aligned with rim) for salt bridges (in red), hydrogen bonds (in blue) and apolar contacts (in golden yellow).

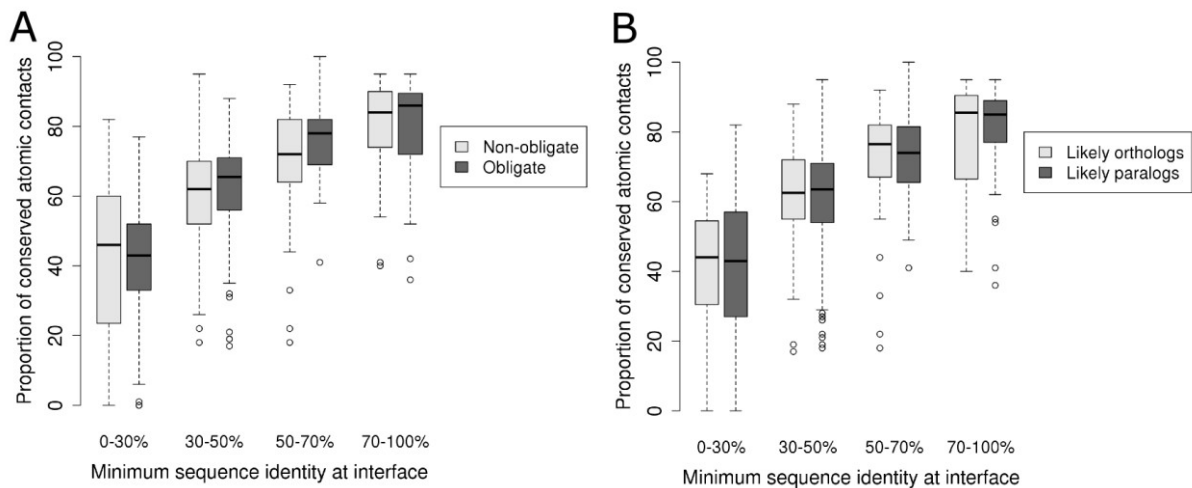

**Supporting Figure 4.** Influence of interaction characteristics on contact conservation. (A-B) Distributions of the proportions of conserved atomic contacts compared for predicted non-obligate interfaces (615 interolog pairs) and predicted obligate interfaces (409 interolog pairs) (A, light grey and dark grey) and likely orthologs (311 interolog pairs) and likely paralogs (713 interolog pairs) (B, light grey and dark grey). The differences for a given range of sequence identity are not significant.

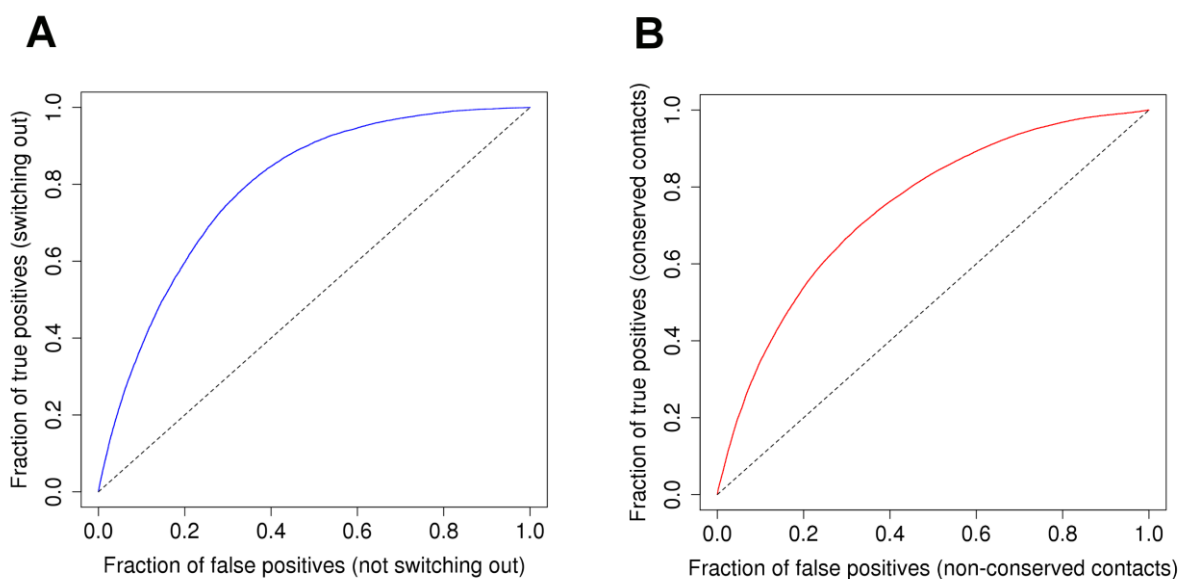

**Supporting Figure 5.** ROC curves for the two designed predictors. (A) ROC curve for the switching out predictor. This curve represents the fraction of true positives recovered (residues actually switching out of the interface) over the fraction of false positives recovered (residues not switching out of the interface) when integrating progressively all residues from all interfaces, sorted on the basis of their score in the switching out predictor (the higher the score, the higher the predicted probability to switch out of the interface). Area under the ROC curve (AUC): 0.79. (B) ROC curve for the atomic contact conservation predictor. This curve represents the fraction of true positives recovered (conserved contacts from all residues included so far) over the fraction of false positives recovered (non-conserved contacts, gained or lost by the residues included so far) when integrating progressively all residues from all interfaces, sorted on the basis of their score in the atomic contact conservation predictor (the higher the score, the higher the predicted probability for a residue both to conserve its contacts and not to gain or lose any contacts in the interolog). Area under the ROC curve (AUC): 0.75.

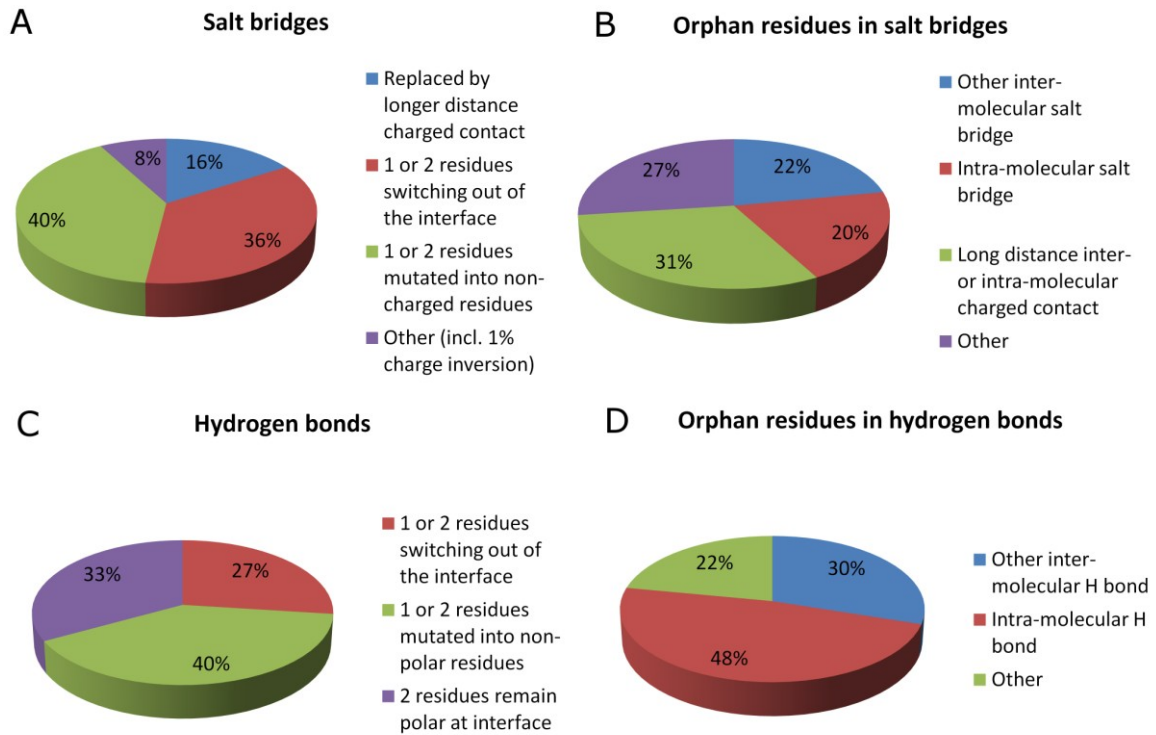

**Supporting Figure 6.** Mechanisms for the recovery of polar contacts. (A-B) Salt bridges. (A) Distribution of the cases of non-conserved salt bridges. (B) Scenarios of recovery for orphan residues (i.e. residues remaining charged but whose partner in one interolog switches out of the interface or is mutated into an uncharged residue). (C-D) Hydrogen bonds. (C) Distribution of the cases of non-conserved hydrogen bonds. (D) Scenarios of recovery for orphan residues (i.e. residues remaining polar but whose partner in one interolog switches out of the interface or is mutated into a non-polar residue).

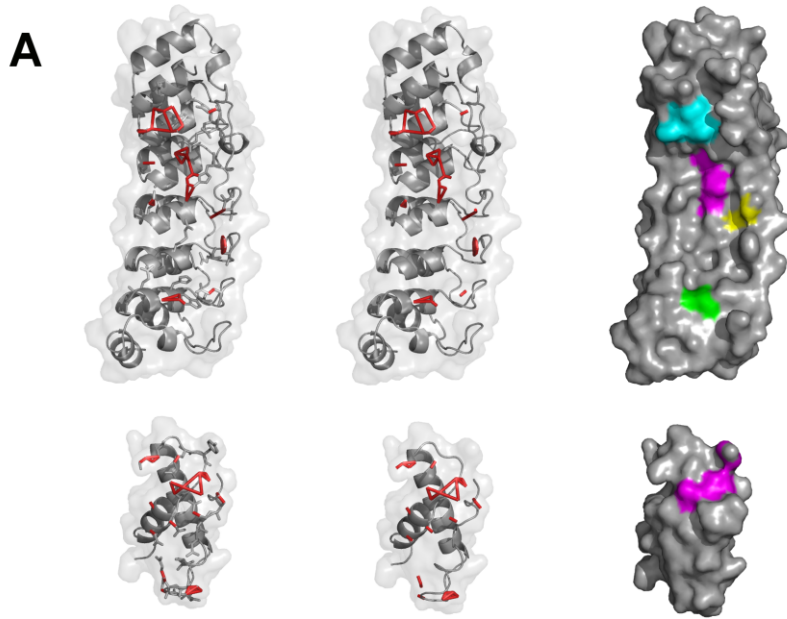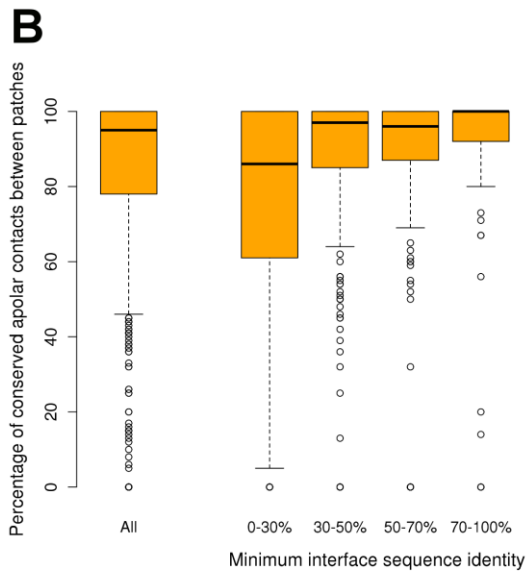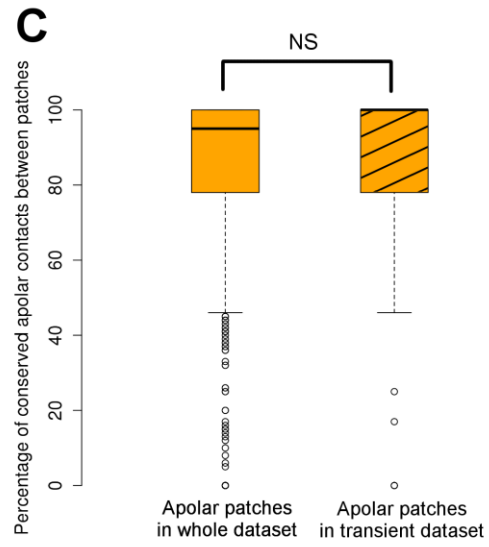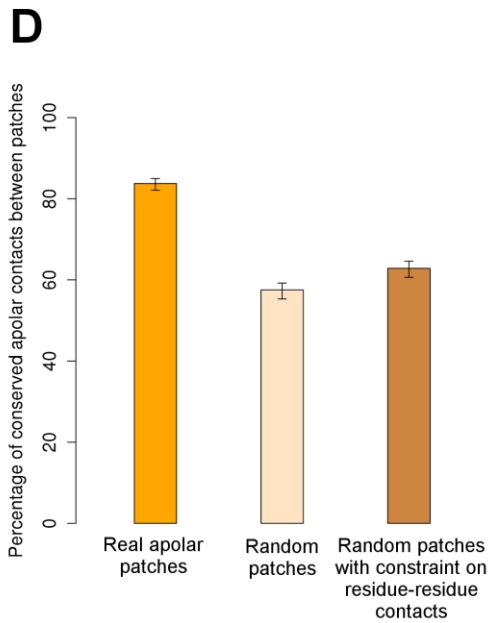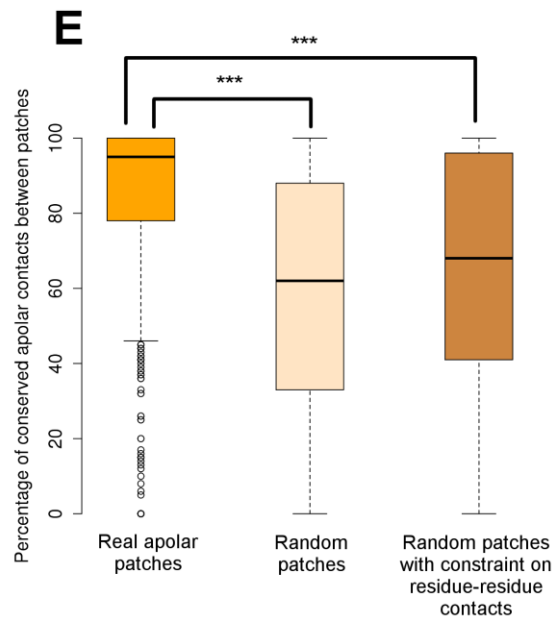

**Supporting Figure 7.** Apolar patches. (A) Illustration of the construction of apolar patches on a complex between Nas6 and Rpt3 in yeast (PDB id 2dzn). On the left and in the middle, red cylinders depict apolar contacts between atoms on the surface of each chain (interface residues are represented as sticks on the left). On the right, apolar patches are colored on the surface of each chain. (B) Distribution of overall contact conservation (“All”) and contact conservation depending on minimum interface sequence identity for apolar contacts between patches. There is a significant difference between 0-30% and 30-50% (p-value = 1.8e-10) and no significant difference between other sequence identity ranges (p-value > 0.05). (C) Distribution of contact conservation for apolar contacts between patches in the whole dataset (left, non-striped) and restricted to the dataset of 60 transient interolog couples (right, striped). The difference between the two distributions is non significant (NS) (p-value = 0.19 in a Wilcoxon rank-sum test). (D) Representation of the mean of each contact conservation distribution for apolar contacts between real apolar patches (left, orange), for apolar contacts between random patches (middle, beige) and for apolar contacts between random patches which were additionally constrained to have the same number of residue-residue contacts as the real apolar patches (right, light brown – see section 10 in Text S1 for a more detailed explanation). The confidence intervals contain 95% of the values obtained for the mean in a bootstrap procedure (1000 resamplings of half the distribution, without replacement). (E) Same as in (D), but with a boxplot representation of the contact conservation distributions. Contact conservation for both distribution concerning random patches is found to be significantly lower than the contact conservation for the real apolar patches (p-value < 2.2e-16 in Wilcoxon rank-sum tests).

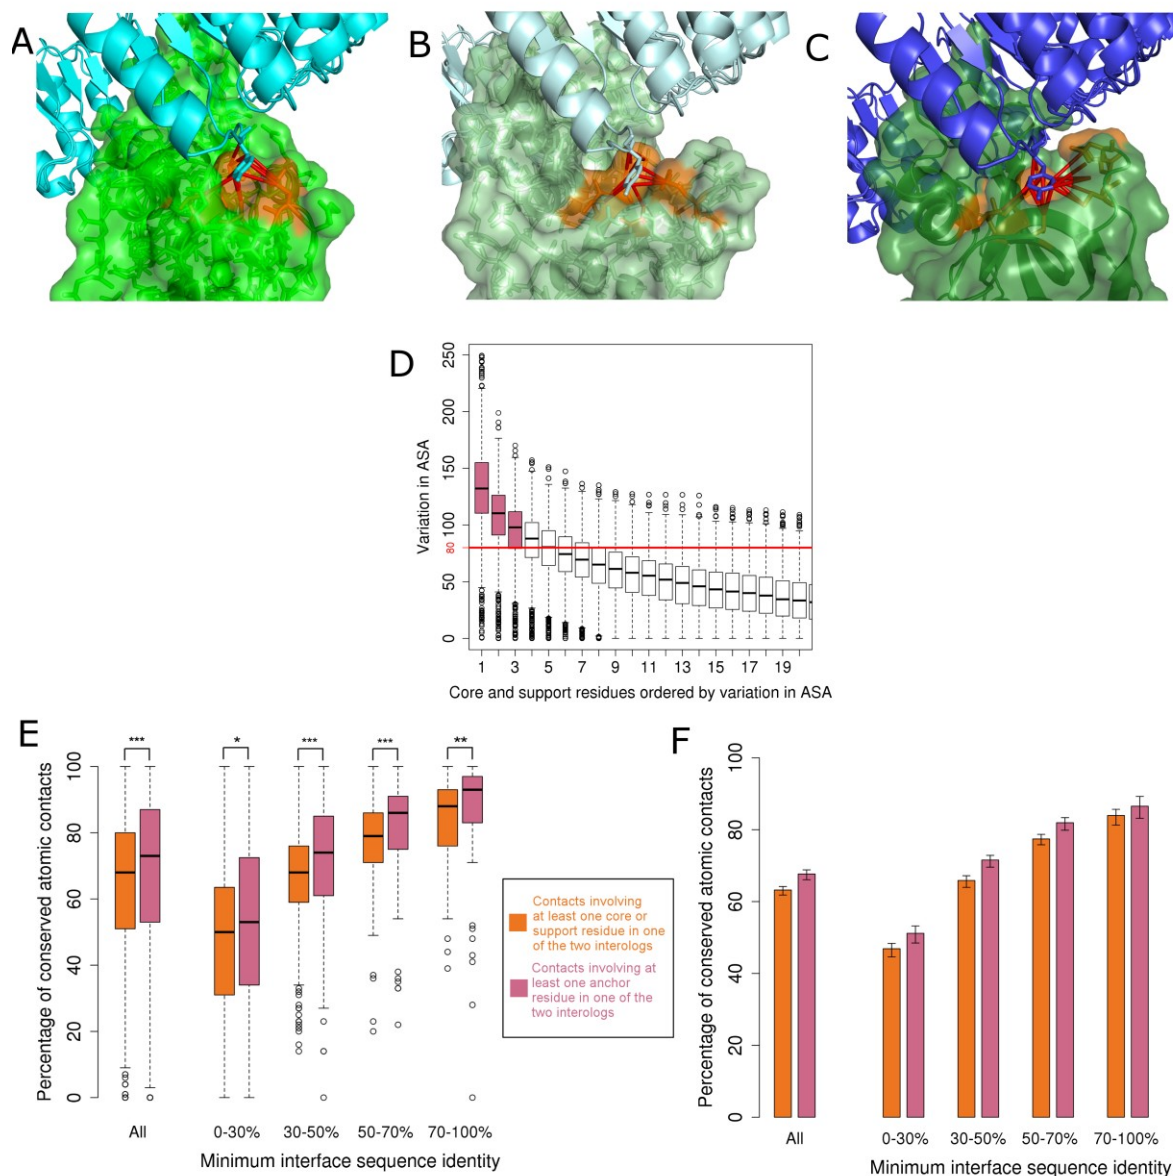

**Supporting Figure 8.** Anchor residues. (A-C) Illustration of the conservation of anchor residues and their contacts. The mutually interologous interfaces are three interfaces in Homo sapiens between a conserved partner (ribonuclease inhibitor, in cyan, light blue and dark blue) and three different partners with 30% to 38% mutual minimum interface sequence identity (in green, light green and dark green; respective PDB ids of the complexes 1a4y, 2bex, 1z7x). The row shows a conserved tyrosine in the blue chains which is an anchor in all 3 interfaces. This tyrosine makes atomic contacts with several residues (in orange) in the 3 interfaces; some of these residues are conserved in all 3 interfaces and others vary. Atomic contact conservation restricted to this residue ranges from 73% to 86% between the 3 pairs of interologs. (D) Distributions of the variation in ASA upon binding for the 20 core and support residues with the highest variation in each interface. Highlighted in pink are the 3 residues with largest variation which are chosen as anchor residues. The absolute 80 Å<sup>2</sup> threshold is



also displayed as a thick horizontal line. (E) Distribution of contact conservation overall (“All” = for all values of minimum sequence identity at interface) and depending on minimum interface sequence identity, for atomic contacts involving at least one residue from the support or core region in one of the two interologs (in reddish orange) and atomic contacts involving at least one anchor residue in one of the two interologs (in dark pink). The overall distributions (“All”) between core/support contacts and anchor contacts are significantly different ( $p$ -value =  $4e-8$  in a Wilcoxon rank-sum test). The  $p$ -values in Wilcoxon rank-sum tests for 0-30%, 30-50%, 50-70% and 70-100% minimum interface sequence identity are respectively : 0.01,  $9e-6$ ,  $7e-6$  and 0.003. (F) Same as (E) but with the mode of representation used in main Figure 2: the mean of each distribution is represented as well as confidence intervals containing 95% of the values obtained for the mean in a bootstrap procedure (1000 resamplings of half the distribution, without replacement).
